# Supplementary material
Source: PubMed Central journal article supplement (PMC4793717)

Supplemental Figure 1

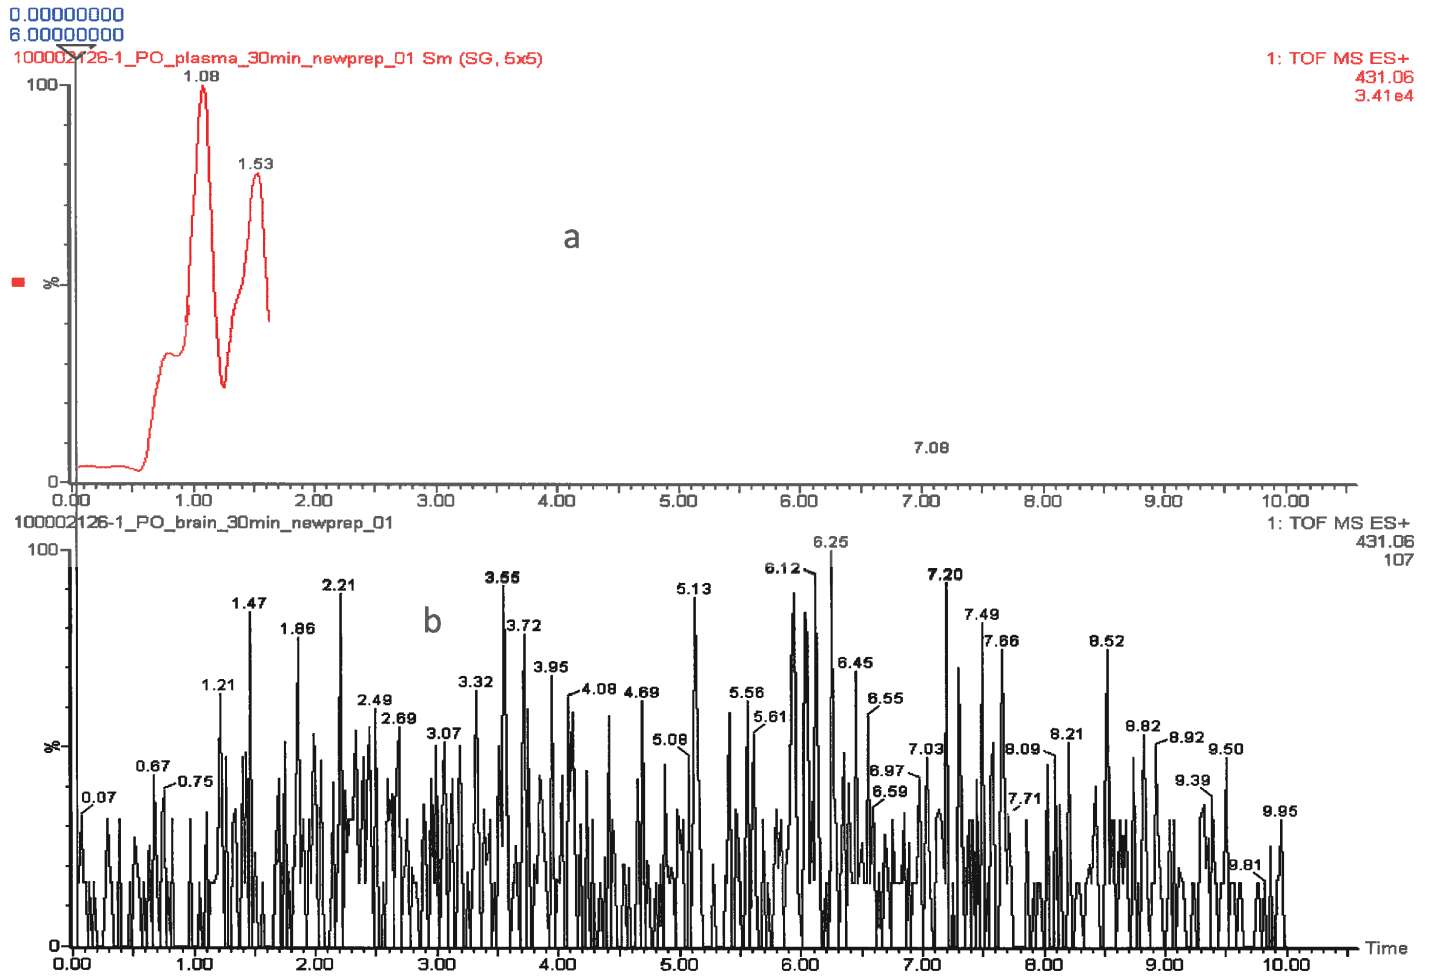

Supplement: NIHMS763634-supplement-Suppl__Fig_1.pdf [file NIHMS763634-supplement-Suppl__Fig_1.pdf]

Supplemental Figure 2

**A**

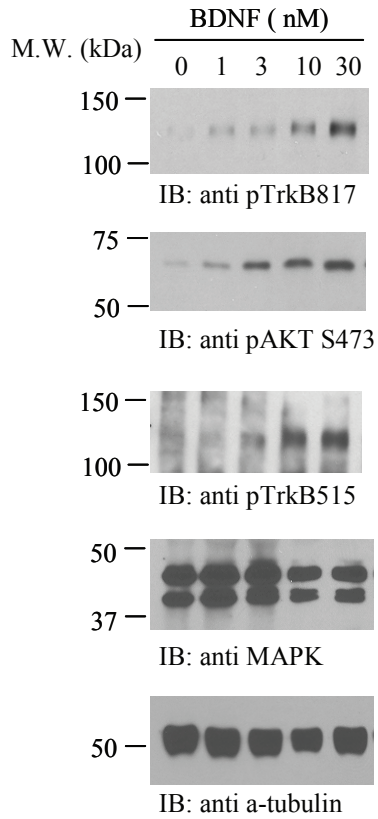

**B**

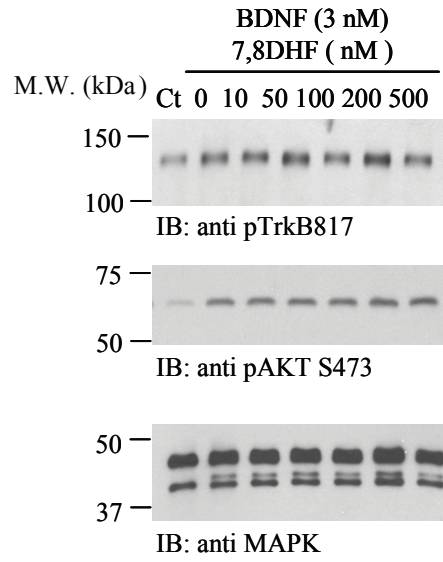

Supplement: NIHMS763634-supplement-Suppl__Fig_2.pdf [file NIHMS763634-supplement-Suppl__Fig_2.pdf]
